# Supplementary material for: Hyperpolarized Carbon-13 Magnetic Resonance Imaging: Technical Considerations and Clinical Applications
Source: PubMed Central journal article supplement — Korean J Radiol. 2024 Apr 18;25(5):459–72. doi: 10.3348/kjr.2024.0069 (PMC11058429; doi:10.3348/kjr.2024.0069), 2024-04-18
Supplement: kjr-25-459-s001.pdf [file kjr-25-459-s001.pdf]

SUPPLEMENTS

**Supplementary Table 1.** Summary of quantitative results from human studies using HP <sup>13</sup>C-MRI

| Authors*                              | Clinical applications                                                               | Quantitative results                                                                                                                                                                                                                                                                                                                                                                                                                                                                                                                     | Additional results                                                                                                                                                                                                                                 |
|---------------------------------------|-------------------------------------------------------------------------------------|------------------------------------------------------------------------------------------------------------------------------------------------------------------------------------------------------------------------------------------------------------------------------------------------------------------------------------------------------------------------------------------------------------------------------------------------------------------------------------------------------------------------------------------|----------------------------------------------------------------------------------------------------------------------------------------------------------------------------------------------------------------------------------------------------|
| <b>Brain</b>                          |                                                                                     |                                                                                                                                                                                                                                                                                                                                                                                                                                                                                                                                          |                                                                                                                                                                                                                                                    |
| Miloushev et al., 2018 [25]           | 1st human brain tumor study                                                         | <i>Kinetic modeling</i><br>Whole brain: $k_{PL} = 0.12$                                                                                                                                                                                                                                                                                                                                                                                                                                                                                  | Higher production of Pyr and Lac in normal cortical/subcortical regions; glycolytic heterogeneity among different brain tumors                                                                                                                     |
| Autry et al., 2020 [26]               | Post radio-chemotherapy follow-up in infiltrative glioma                            | <i>Kinetic modeling</i><br>Glioma patient<br>Normal brain: $k_{PL} = 0.020$ , $k_{PB} = 0.006$ ; normal brain post bevacizumab: $k_{PL} = 0.047$ , $k_{PB} = 0.011$ ; glioma (contrast enhancing): $k_{PL} = 0.032-0.041$ ; glioma (T2 hyperintense): $k_{PL} = 0.024$<br>Healthy volunteer<br>Normal brain: $k_{PL} = 0.018$ , $k_{PB} = 0.004$                                                                                                                                                                                         | Global elevation of $k_{PL}$ and $k_{PB}$ post bevacizumab; elevated $k_{PL}$ and $k_{PB}$ in progressive disease                                                                                                                                  |
| Autry et al., 2021 [27]               | Pediatric brain tumor vs. normal brain, pediatric safety profile                    | <i>Model free</i><br>Whole brain: $SNR_{Pyr} = 7.85 \times 10^2 - 3.52 \times 10^3$ , $SNR_{Lac} = 1.75 \times 10^2 - 7.20 \times 10^4$ , $SNR_{Bic} = 64 - 1.52 \times 10^4$                                                                                                                                                                                                                                                                                                                                                            | Safety of HP <sup>13</sup> C-MRI in pediatric patients                                                                                                                                                                                             |
| Lee et al., 2021 [28]                 | Prediction of radiotherapy response in intracranial metastases                      | <i>Model free</i><br>z-score = -2.33-3.74                                                                                                                                                                                                                                                                                                                                                                                                                                                                                                | Tumors with highest z-scores are associated with radiotherapy failure                                                                                                                                                                              |
| Chen et al., 2021 [29]                | Glioblastoma vs. normal brain                                                       | <i>Model free</i><br>Glioblastoma: Lac/TC = 0.310, Bic/TC = 0.086; normal brain: Lac/TC = 0.246, Bic/TC = 0.108                                                                                                                                                                                                                                                                                                                                                                                                                          | 1st vs. 2nd injections: metabolites/TC were insignificantly higher in 2nd injection                                                                                                                                                                |
| Zaccagna et al., 2022 [30]            | Glioblastoma vs. normal brain                                                       | <i>Kinetic modeling</i> ( $\times 10^{-3}$ )<br>Glioblastoma: $k_{PL} = 16.1$ , $k_{PB} = 1.7$ ; normal brain: $k_{PL} = 16.5$ , $k_{PB} = 2.4$<br><i>Model free</i><br>Glioblastoma: Lac/Pyr = 0.34, Bic/Pyr = 0.06; normal brain: Lac/Pyr = 0.36, Bic/Pyr = 0.10                                                                                                                                                                                                                                                                       | Bic/Pyr negatively correlates with lesion volume and volume of enhancing tissue; Bic/Pyr positively correlates with percentage of non-enhancing core; LDHA positively correlates with Lac/Pyr; MCT4 positively correlates with Bic/Pyr and Bic/Lac |
| Grist et al., 2019 [31]               | Technical feasibility in healthy human brain                                        | <i>Kinetic modeling</i><br>Whole brain: $k_{PL} = 0.012$ , $k_{PB} = 0.002$                                                                                                                                                                                                                                                                                                                                                                                                                                                              | Higher metabolites signal in gray matter compared to white matter                                                                                                                                                                                  |
| Lee et al., 2020 [32]                 | Metabolite topography in healthy human brain                                        | Not available                                                                                                                                                                                                                                                                                                                                                                                                                                                                                                                            | Lac topography unveils a region-specific distribution of Lac in the brain, which is consistent across individuals                                                                                                                                  |
| Hackett et al., 2020 [33]             | Traumatic brain injury                                                              | <i>Model free</i><br>Patient 1: trauma vs normal: Bic/TC = 0.027 vs. 0.059, Lac/TC = 0.236 vs. 0.191<br>Patient 2: trauma vs normal: Bic/TC = 0.025 vs. 0.047, Lac/TC = 0.164 vs. 0.162                                                                                                                                                                                                                                                                                                                                                  | Mild traumatic brain injury without discernible anatomic change or hemorrhage on MRI                                                                                                                                                               |
| Ma et al., 2022 [34]                  | Technical feasibility in healthy human brain                                        | <i>Kinetic modeling</i><br>Whole brain: $k_{PL} = 0.014-0.018$ , $k_{PB} = 0.004-0.006$<br><i>Model free</i><br>Whole brain: Lac/TC = 0.21-0.24, Bic/TC = 0.065-0.091                                                                                                                                                                                                                                                                                                                                                                    | Lac/TC and Bic/TC linearly correlate with fractional gray matter volume                                                                                                                                                                            |
| Uthayakumar et al., 2023 [35]         | Metabolic changes in brain aging                                                    | <i>Model free</i><br>A 7% $\pm$ 2% decrease per decade for Lac and a 9% $\pm$ 4% decrease per decade for Bic                                                                                                                                                                                                                                                                                                                                                                                                                             | Variability in aging-related metabolic changes is observed across different brain regions                                                                                                                                                          |
| <b>Heart and skeletal muscle</b>      |                                                                                     |                                                                                                                                                                                                                                                                                                                                                                                                                                                                                                                                          |                                                                                                                                                                                                                                                    |
| Cunningham et al., 2016 [36]          | 1st human healthy heart study                                                       | <i>Model free</i><br>$SNR_{Pyr} = 115$ , $SNR_{Bic} = 56$ , $SNR_{Lac} = 53$                                                                                                                                                                                                                                                                                                                                                                                                                                                             | Pyr signal observed only in cardiac chamber, Bic only in myocardium, Lac in both chamber and myocardium                                                                                                                                            |
| Rider et al., 2020 [37]               | Healthy vs. diabetic heart                                                          | <i>Model free</i> ( $\times 10^{-2}$ )<br>Healthy heart: Bic/Pyr = 0.84, Lac/Pyr = 5.16, Ala/Pyr = 3.17;<br>diabetic heart: Bic/Pyr = 0.16, Lac/Pyr = 8.51, Ala/Pyr = 3.82                                                                                                                                                                                                                                                                                                                                                               | Significantly increased Pyr-to-Bic flux after oral glucose challenge                                                                                                                                                                               |
| Park et al., 2020 [38]                | Cardiotoxicity of doxorubicin                                                       | <i>Model free</i><br>Before doxorubicin: Bic/TC = 0.036, Lac/TC = 0.448, Ala/TC = 0.045;<br>after doxorubicin: Bic/TC = 0.032, Lac/TC = 0.440, Ala/TC = 0.045                                                                                                                                                                                                                                                                                                                                                                            | Hemoglobin, high-sensitivity troponin, and left ventricular global longitudinal strain also change after chemotherapy                                                                                                                              |
| Ma et al., 2022 [39]                  | End diastolic vs. end systolic in healthy heart                                     | <i>Model free</i><br>End diastolic to end systolic: Bic/Lac = 21.6 decrease, Bic/Ala = 9.4 decrease                                                                                                                                                                                                                                                                                                                                                                                                                                      | The decrease in Bic/Lac from end diastolic to end systolic occurs prominently in the mid-anterior and mid-inferoseptal segments of heart                                                                                                           |
| Park et al., 2021 [40]                | Rest vs. exercise vs. recovery in healthy calf skeletal muscle                      | <i>Model free</i><br>Rest: Lac/TC = 0.18, Bic/TC = 0.004; exercise: Lac/TC = 0.31, Bic/TC = 0.036;<br>recovery: Lac/TC = 0.42, Bic/TC = 0.002                                                                                                                                                                                                                                                                                                                                                                                            | TC (perfusion) at rest increases to 2.8-fold with exercise and to 3.2-fold during recovery                                                                                                                                                         |
| <b>Body and oncology</b>              |                                                                                     |                                                                                                                                                                                                                                                                                                                                                                                                                                                                                                                                          |                                                                                                                                                                                                                                                    |
| Woitek et al., 2020 [41]              | Post neoadjuvant chemotherapy follow-up in breast cancer                            | <i>Kinetic modeling</i><br>37% decrease in $k_{PL}$ after neoadjuvant chemotherapy<br><i>Model free</i><br>34% decrease in Lac/Pyr after neoadjuvant chemotherapy                                                                                                                                                                                                                                                                                                                                                                        | After neoadjuvant chemotherapy 76% decrease in tumor volume but 132% increase in $K^{trans}$ and 31% increase in $k_{ep}$ ; pathologic complete response after neoadjuvant chemotherapy                                                            |
| Woitek et al., 2021 [42]              | Very early neoadjuvant chemotherapy response assessment in breast cancer            | <i>Kinetic modeling</i><br>Breast cancer post chemotherapy<br>$k_{PL} = 0.0064 \rightarrow 0.0079$<br><i>Model free</i><br>Breast cancer post chemotherapy: $SNR_{Pyr} = 19.7 \rightarrow 16.5$ , $SNR_{Lac} = 7.0 \rightarrow 4.5$ , Lac/Pyr = 0.28 $\rightarrow$ 0.34                                                                                                                                                                                                                                                                  | $\geq 20\%$ increase of Lac/Pyr predicts pathologic complete response                                                                                                                                                                              |
| Tran et al., 2019 [43]                | Intratumoral metabolic heterogeneity of RCC                                         | Not available                                                                                                                                                                                                                                                                                                                                                                                                                                                                                                                            | Variability in Lac signal correlates with Lac levels in tumor samples on LC-MS analysis                                                                                                                                                            |
| Tang et al., 2021 [44]                | Tumor grade and histopathologic type of RCC                                         | <i>Model free</i><br>Lac/Pyr: chromophobe RCC > grade 3 ccRCC > grade 2 ccRCC                                                                                                                                                                                                                                                                                                                                                                                                                                                            | Demonstration of good reproducibility of HP <sup>13</sup> C-MRI by performing 2 acquisitions in the same day                                                                                                                                       |
| Ursprung et al., 2022 [45]            | Prediction of tumor grade of RCC                                                    | <i>Kinetic modeling</i> (median)<br>$k_{PL}$ : ccRCC = 0.0065, normal kidney = 0.0043, liposarcoma = 0.0152, pheochromocytoma = 0.0086, oncocytoma = 0.0022<br><i>Model free</i> (median)<br>$SNR_{Pyr}$ : ccRCC = 26.7, normal kidney = 30.1, liposarcoma = 31.9, pheochromocytoma = 34.0, oncocytoma = 12.3; $SNR_{Lac}$ : ccRCC = 5.7, normal kidney = 3.4, liposarcoma = 10.5, pheochromocytoma = 6.0, oncocytoma = 1.0; Lac/Pyr: ccRCC = 0.13, normal kidney = 0.14, liposarcoma = 0.35, pheochromocytoma = 0.17, oncocytoma = 0.14 | Increasing $k_{PL}$ correlates with higher tumor grade; Lac/Pyr negatively correlates with ADC; MCT1 expression (but not MCT4) positively correlates with $k_{PL}$ ; MCT1 expression independently predicts overall survival of RCC patients       |
| Lee et al., 2022 [46]                 | Comparison among normal intrabdominal solid organs: liver, kidney, pancreas, spleen | <i>Kinetic modeling</i><br>$k_{PL}$ : liver = 0.019, kidney (R) = 0.0036, kidney (L) = 0.0033, pancreas = 0.0063, spleen = 0.0096; $k_{PB}$ : liver = 0.012, kidney (R) = 0.0011, kidney (L) = 0.00087, pancreas = 0.0034, spleen = 0.00073                                                                                                                                                                                                                                                                                              | The liver exhibits a comparatively lower absolute metabolite signal, yet the highest metabolite conversion rates                                                                                                                                   |
| Stødkilde-Jørgensen et al., 2020 [47] | Tumor vs. normal in pancreatic cancer                                               | <i>Model free</i><br>Pancreatic cancer: Ala/Lac = 0.33; normal pancreas: Ala/Lac = 0.23                                                                                                                                                                                                                                                                                                                                                                                                                                                  | Ala/Lac as a potential biomarker to detect pancreatic cancer                                                                                                                                                                                       |
| Gordon et al., 2023 [48]              | Tumor vs. normal, early response prediction in pancreatic cancer                    | <i>Model free</i><br>Pancreatic cancer: Lac/Pyr = 0.30-1.65, Ala/Pyr = < 0.01-0.14, Ala/Lac = < 0.01-0.46; normal pancreas: Lac/Pyr = 0.20-0.27, Ala/Pyr = 0.06-0.15, Ala/Lac = 0.24-0.79                                                                                                                                                                                                                                                                                                                                                | Early metabolic response at 4 weeks correlates with subsequent tumor response                                                                                                                                                                      |
| Nelson et al., 2013 [49]              | Tumor vs. normal in prostate cancer                                                 | <i>Kinetic modeling</i><br>Prostate cancer: $k_{PL} = 0.013$                                                                                                                                                                                                                                                                                                                                                                                                                                                                             | 1st human study in prostate cancer, safety profile                                                                                                                                                                                                 |
| Aggarwal et al., 2017 [50]            | Early response for androgen deprivation therapy in prostate cancer                  | <i>Kinetic modeling</i><br>Prostate cancer post androgen deprivation therapy: $k_{PL} = 0.025 \rightarrow 0.007$                                                                                                                                                                                                                                                                                                                                                                                                                         | Only modest changes in tumor size and ADC value                                                                                                                                                                                                    |
| Chen et al., 2020 [51]                | Feasibility in bone and liver metastasis in castration-resistant prostate cancer    | <i>Kinetic modeling</i><br>Bone metastases: $k_{PL} = 0.020$ ; liver metastases: $k_{PL} = 0.026$ ; liver metastasis post chemotherapy: $k_{PL} = 0.026 \rightarrow 0.015$<br><i>Model free</i><br>Bone metastasis: $SNR_{TC} = 117$ ; liver metastasis: $SNR_{TC} = 85$                                                                                                                                                                                                                                                                 | RNA-seq found higher LDHA expression relative to the dominant isoform of LDH                                                                                                                                                                       |
| Granlund et al., 2020 [52]            | Tumor grade of prostate cancer                                                      | <i>Model free</i><br>max Lac/TC = 0.35<br>Time to max Lac/TC = 44 s                                                                                                                                                                                                                                                                                                                                                                                                                                                                      | Lac increases with Gleason tumor grade; regions exhibiting high Lac also show high MCT1 expression and loss of PTEN                                                                                                                                |
| de Kouchkovsky et al., 2022 [53]      | Early immunotherapy response assessment in castration-resistant prostate cancer     | <i>Kinetic modeling</i><br>Prostate cancer post immunotherapy: $k_{PL} = 0.0273 \rightarrow$ undetectable, $k_{PL} = 0.0147 \rightarrow 0.0006$                                                                                                                                                                                                                                                                                                                                                                                          | Metabolic response is more significant than morphologic response                                                                                                                                                                                   |
| Chen et al., 2022 [54]                | Integration with MR/TRUS fusion-guided biopsy in prostate cancer                    | <i>Kinetic modeling</i><br>$k_{PL} > 0.02$ as biomarker of suspected cancer; prostate cancer: $k_{PL} = 0.0319$ ; normal prostate: $k_{PL} = 0.0110$                                                                                                                                                                                                                                                                                                                                                                                     | 4 of 6 $k_{PL}$ targets on HP <sup>13</sup> C-MRI did not correlate to PIRDAS targets on conventional MRI                                                                                                                                          |
| Sushentsev et al., 2022 [55]          | Metabolic phenotyping in intermediate risk prostate cancer                          | <i>Kinetic modeling</i><br>Prostate cancer: $k_{PL} = 0.011$<br><i>Model free</i><br>Prostate cancer: $SNR_{Lac} = 12$ , $SNR_{Pyr} = 33$ , $SNR_{TC} = 53$                                                                                                                                                                                                                                                                                                                                                                              | $SNR_{Lac}$ positively correlates to % Gleason pattern 4 and mean ADC values                                                                                                                                                                       |
| Lin et al., 2024 [56]                 | Immune activation of spleen post chemoradiotherapy                                  | <i>Model free</i> ( $\times 10^{-2}$ )<br>Responder: Pyr/TC = 91.5, Lac/TC = 3.6; nonresponder: Pyr/TC = 74.4, Lac/TC = 19.9                                                                                                                                                                                                                                                                                                                                                                                                             | Lower baseline metabolism in spleen correlates with better response to chemoradiotherapy                                                                                                                                                           |

Unless specified otherwise, data are presented as mean values.

\*The numbers enclosed in brackets correspond to the numbers of the articles listed in the reference section of the main paper.

HP = hyperpolarized, Pyr = pyruvate, Lac = lactate, Ala = alanine, Bic = bicarbonate, TC = total carbon, SNR = signal-to-noise ratio, LDH = lactate dehydrogenase (isoform: LDHA), MCT = monocarboxylate transporter (isoform: MCT1, MCT4), RCC = renal cell carcinoma, cc = clear cell, ADC = apparent diffusion coefficient, TRUS = transrectal ultrasound

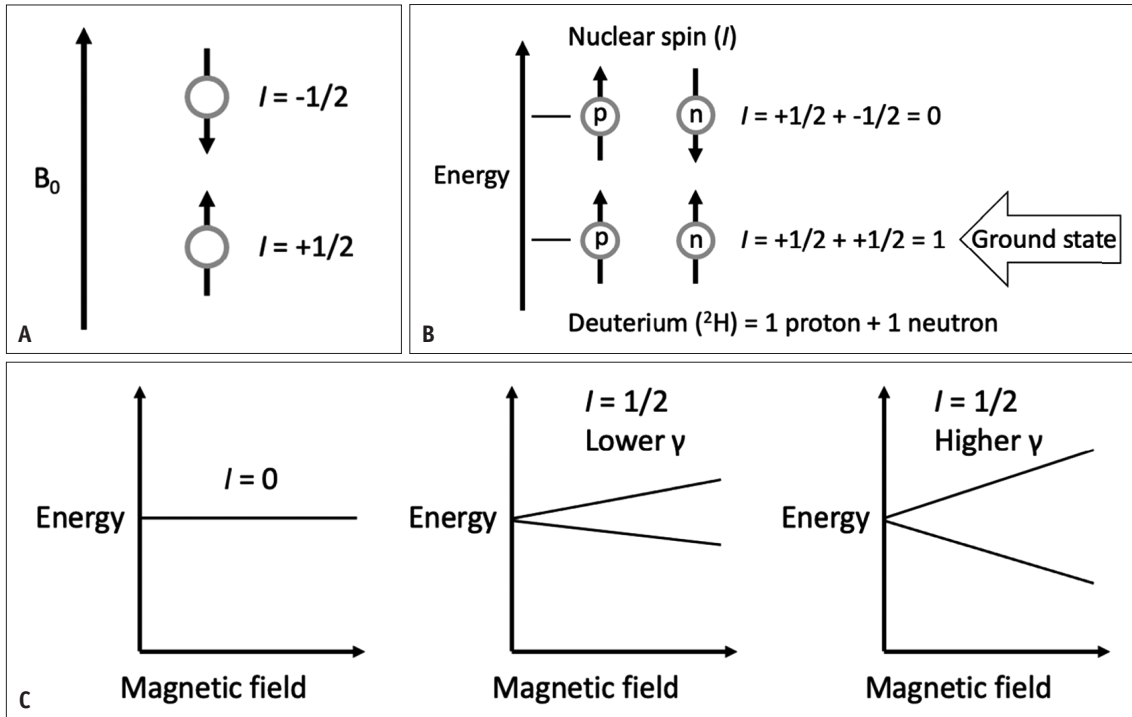

**Supplementary Fig. 1.** Fundamental principles of nuclear spin. **A:** Nuclear spin is an intrinsic property of particles, always manifesting as either  $+1/2$  or  $-1/2$ . **B:** In nature, nuclear spin results from the combined spins of protons and neutrons, existing exclusively in the ground state ( $I$ ) with values such as  $0$ ,  $1/2$ ,  $1$ ,  $3/2$ , and so on. **C:** The ground state comprises “ $2I + 1$ ” sublevels. Upon the application of a magnetic field, slight energy differences arise between these sublevels, leading to Zeeman splitting. Nuclei with  $I = 0$  exhibit only one sublevel, lack Zeeman splitting, and remain inactive in MRI ( $^{12}\text{C}$ ), whereas nuclei with  $I \neq 0$  ( $^1\text{H}$  and  $^{13}\text{C}$ ) are nuclear magnetic resonance active due to having multiple sublevels. Notably, nuclei with higher gyromagnetic ratios ( $\gamma$ ) experience more significant splitting when a magnetic field is applied.

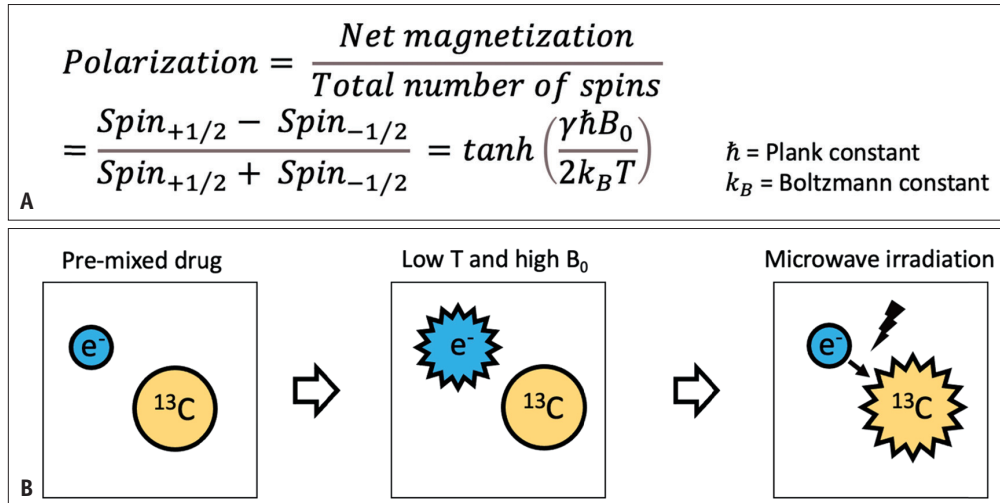

**Supplementary Fig. 2.** Basic concepts of DNP. **A:** Polarization is a function of gyromagnetic ration ( $\gamma$ ), magnitude of magnetic field ( $B_0$ ), and temperature ( $T$ ). To polarize nuclei with lower  $\gamma$ , higher magnetic field and lower temperature environment are required. For example, clinical polarizer SPINlab™ operates at  $B_0 = 5\text{T}$  and  $T = 0.8\text{ k}$ . **B:** Directly polarizing the  $^{13}\text{C}$  nucleus (the brute force method) presents an engineering challenge and is time-consuming, making it impractical for clinical use. Electrons have a high  $\gamma$  of 28025 and are more amenable to polarization. DNP offers a clinically feasible solution by transferring polarization from electrons to  $^{13}\text{C}$  nuclei, achieving 20%–30%  $^{13}\text{C}$  polarization (equivalent to > 10000 signal enhancement) within 2–3 hours. DNP = dynamic nuclear polarization
